# Supplementary material for: Fluorescence Super-Resolution Imaging Chip for Gene Silencing Exosomes
Source: MDPI journal article supplement (doi:10.3390/s24010173), 2023-12-28
Supplement: s1 [file s1]

# Fluorescence Super-Resolution Imaging Chip for Gene Silencing

## Exosomes

Gaoqiang Yin, Tongsheng Qi, Jinxiu Wei, TingYu Wang, Zhuyuan Wang, Yiping Cui, Shenfei Zong \*

1 Southeast University, School of Electronic Science & Engineering, Advanced Photonics Center, Nanjing 210096, China

\* [sfzong@seu.edu.cn](mailto:sfzong@seu.edu.cn);

**Supplementary Table S1. The sequences of docking and imager strands for individual biomarker.**

| Identification               | Sequences                                                                                           |
|------------------------------|-----------------------------------------------------------------------------------------------------|
| Docking strands for PD-L1    | 5'-Azide-TTATCTACATA-3'                                                                             |
| Imager strands for PD-L1     | 5'-TATGTAGATC-Cy5-3'                                                                                |
| CD63 adaptor strands         | 5'-CAC CCC ACC TCG CTC CCG TGA CAC TAA TGC TA- (CH <sub>2</sub> ) <sub>6</sub> -NH <sub>2</sub> -3' |
| PD-L1 adaptor strands        | 5'-Alexa Fluor 647-T ACA GGT TCT GGG GGG TGG GTG GGG AAC CTG TT-3'                                  |
| PD-L1 siRNA sense strand     | 5'-GGAUAAGAACAUAUUCAA[dT][dT]-3'                                                                    |
| PD-L1 siRNA antisense strand | 5'-UUGAAUAAUGUUCUAUCC[dT][dT]-3'                                                                    |

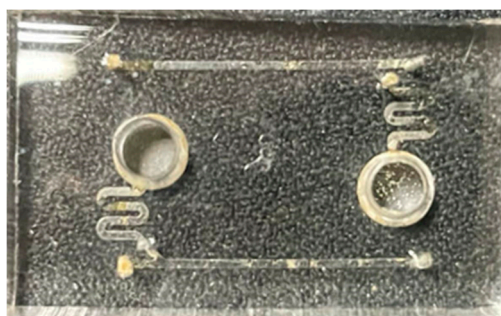

**Figure S1. The photograph of the microfluidic chip.**

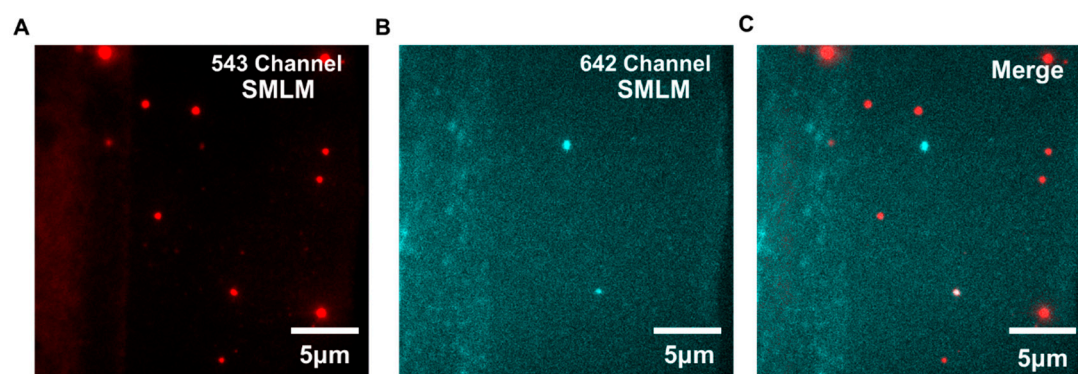

**Figure S2. Investigating the specificity of PD-L1 aptamers toward exosomal PD-L1 using nonspecific control probes. (A) PKH26 membrane dye channel (exosomes), (B) Alexa fluor 647**

channel (control probes), (C) merged image of the two channels.
